# Supplementary material
Source: publisher figshare collection journal article supplement (https://acs.figshare.com/ndownloader/files/5856021)
Supplement: Supplementary file 1 [file 5856021]

# Supporting Information

## Supercapacitors Based on Reduced Graphene Oxide Nanofibers Supported Ni(OH)<sub>2</sub> Nanoplates with Enhanced Electrochemical Performance

*Chaoqi Zhang, Qidi Chen, Hongbing Zhan \**

College of Materials Science and Engineering, Fuzhou University, Fuzhou, Fujian,

350116, People's Republic of China

\*E-mail: hbzhan@fzu.edu.cn

## ***Characterization***

Information about the microstructural morphologies of the samples were obtained by scanning electron microscopy (SEM, Supra55, Zeiss, Germany) and transmission electron microscopy (TEM, Tecnai G2F20 S-TWIN). The crystal structures were characterized using X-ray diffraction (XRD, D/max-UltimaIII, Rigaku, Japan) equipped with Cu K $\alpha$  radiation ( $\lambda = 0.15418$  nm) at a  $5^\circ \text{ min}^{-1}$  scanning rate ( $2\theta$ ,  $5^\circ$ - $80^\circ$ ). X-ray photoelectron spectroscopy (XPS, ESCALAB 250) and Raman spectroscopy (inVia +Reflex, Renishaw) were also conducted. Thermogram was studied using a thermal analyzer (TG-DTA, SDT Q600, TA, USA) under air flow ( $5^\circ \text{ C min}^{-1}$ ). Nitrogen adsorption/desorption isotherms (3Flex Surface Characterization Analyzer, USA) was tested to obtain the specific surface area.

## ***Electrochemical Measurements***

The electrochemical measurements (CHI 660E, CH Instruments, China) of various composites were measured using a three-electrode testing in 6 M KOH aqueous solution. Pt foil and Hg/HgO electrode were applied as the counter electrode and reference electrode, respectively. When testing the CNF and GONF, the electrolyte changes to 1 M Na<sub>2</sub>SO<sub>4</sub>, and the reference electrode changes to saturated calomel electrode(SCE). The working electrode obtained through mixing 85 wt% as-prepared composites, 10 wt% carbon black and 5 wt% polyvinylidene fluoride (PVDF), dissolving in N-methylpyrrolidone. The mixture slurry was loaded on Ni foam current collector (1 cm  $\times$  1 cm), dried at 100  $^\circ\text{C}$  overnight and compressed. The mass loading of the electrode was about 2-2.5 mg. The SC obtained from cyclic voltammetry (CV) curves was calculated by the following equation: <sup>6</sup>

$$C = \frac{Q_{(electrode)} - Q_{(Ni\ foam)}}{m_{(electrode)} \Delta V} = \frac{\int I_{(electrode)} dV - \int I_{(Ni\ foam)} dV}{v m_{(electrode)} \Delta V}$$

Where  $I$  (A) is the voltammetric current,  $v$  ( $\text{V s}^{-1}$ ) is the potential scan rate,  $m$  (g) is the mass loading of the whole active material of electrode, and  $\Delta V$  (V) is the potential in one sweep segment.

In two-electrode system, the rGONF/Ni(OH)<sub>2</sub> composite, active carbon (AC), as the negative and positive electrode, respectively, which separated by a polypropylene membrane, and placed into a 2032 coin cell. The mass proportion of the positive and negative material was 0.34, obtained from the formula:  $m^+/m^- = C^- \cdot \Delta V^- / C^+ \cdot \Delta V^+$ . The SC was calculated as:  $C = (\int IdV) / vm\Delta V$ , where m (g) is the whole mass of the two-electrode material. The power density is obtained as:  $P = E/\Delta t$ , where E is energy density and  $\Delta t$  is the time for one sweep segment.

## Supplementary figures and tables

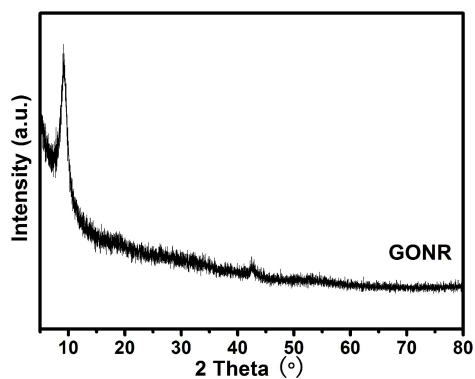

**Figure S1.** XRD patterns of GONR.

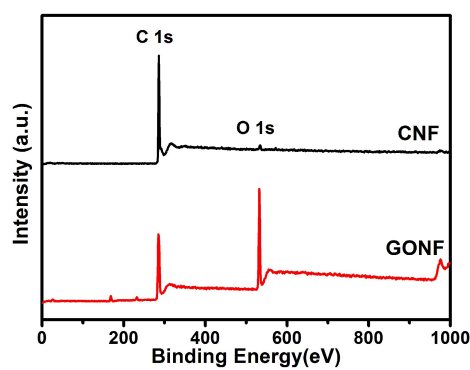

**Figure S2.** The XPS survey spectra of CNF and GONF.

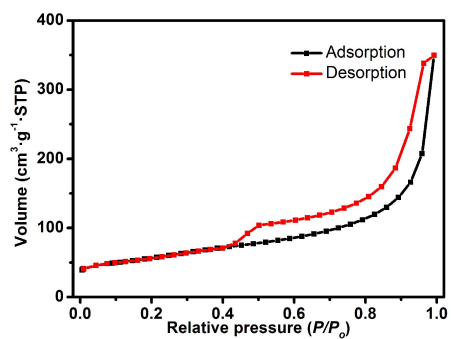

**Figure S3.** Nitrogen adsorption and desorption isotherms of GONF.

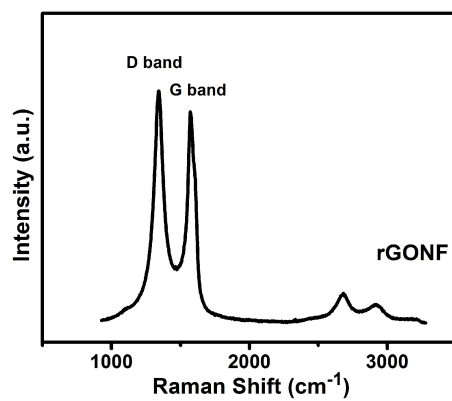

**Figure S4.** Raman spectra of rGONF.

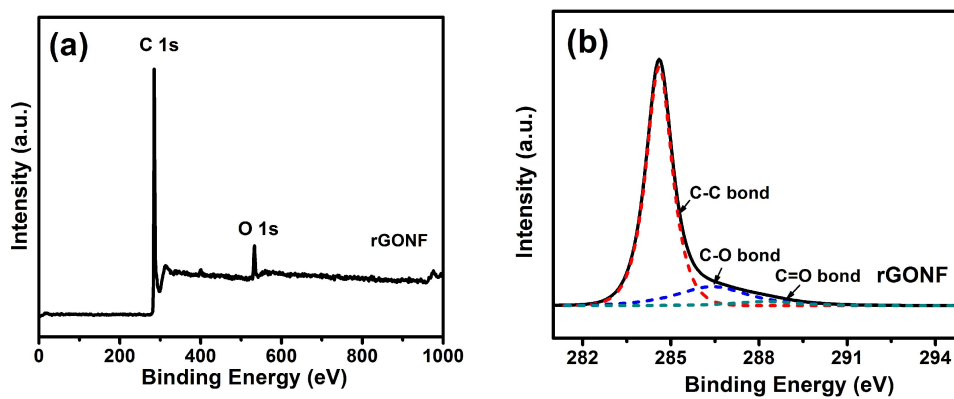

**Figure S5.** (a) XPS survey spectrum of rGONF; (b) XPS spectrum of C 1s;.

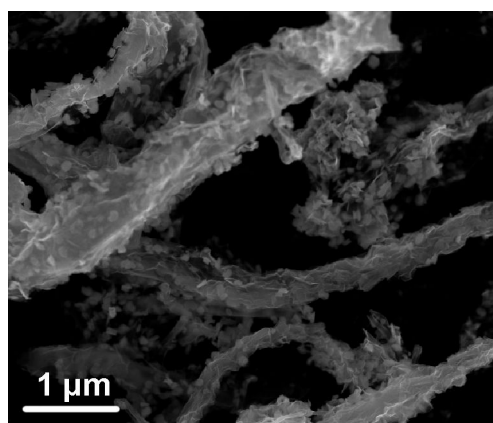

**Figure S6.** SEM image of rGONF/Ni(OH)<sub>2</sub> composite.

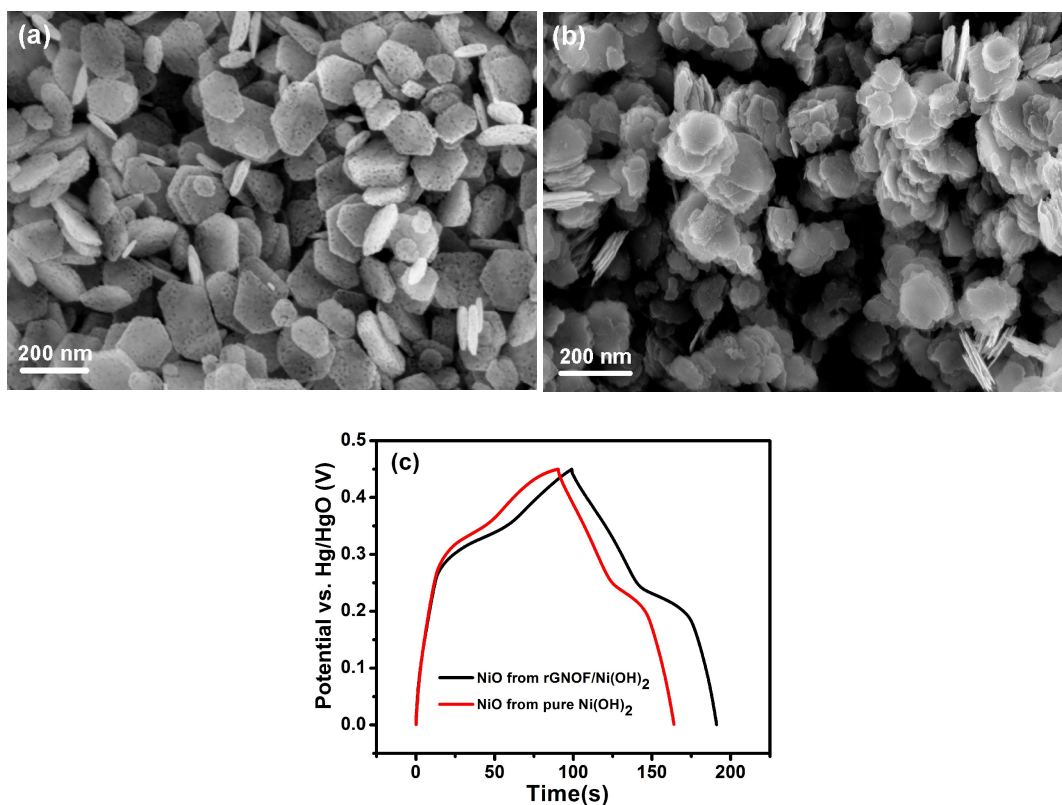

**Figure S7.** SEM images of NiO obtained from pure  $\text{Ni}(\text{OH})_2$  (a) and  $\text{rGONF}/\text{Ni}(\text{OH})_2$  composite (b). (c) Galvanostatic charge/discharge curves at a current density of  $1 \text{ A g}^{-1}$ .

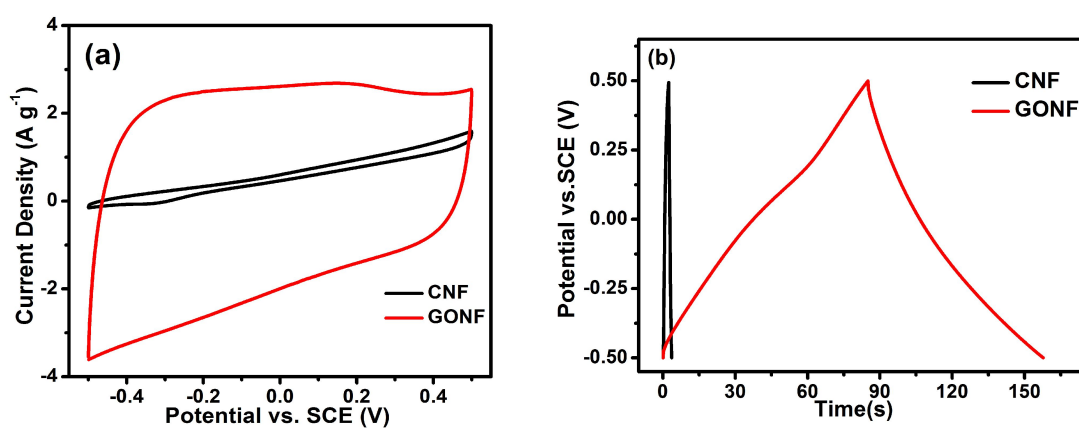

**Figure S8.** (a) CV curves of CNF and GONF at a scan rate of  $40 \text{ mV s}^{-1}$ . (b) Galvanostatic charge/discharge curves of CNF and GONF at a current density of  $1 \text{ A g}^{-1}$ .

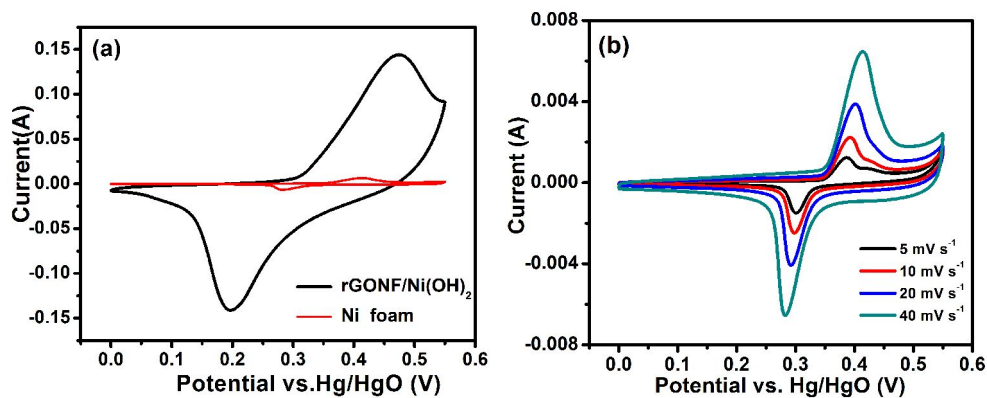

**Figure S9.** (a) CV curves of Ni foam with (black curve) and without (red curve) loading 2 mg of rGONF/Ni(OH)<sub>2</sub> composite. Scan rate: 40 mV s<sup>-1</sup>. (b) The CV curves of Ni foam at various scan rates.

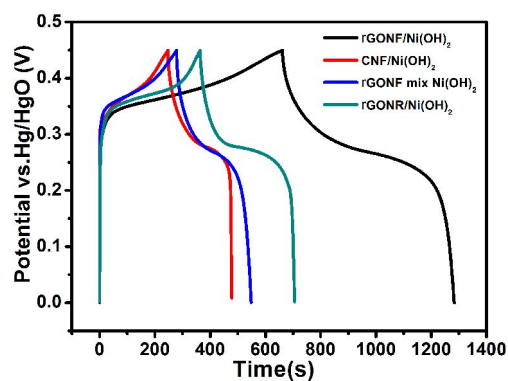

**Figure S10.** Galvanostatic discharge curves at 1 A g<sup>-1</sup> current density.

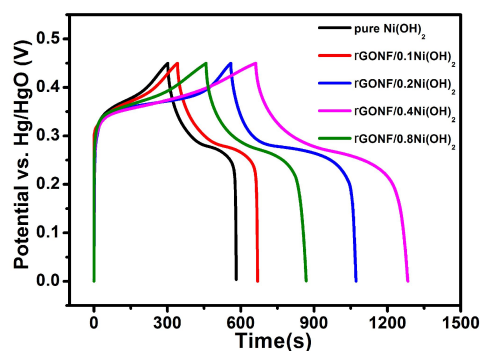

**Figure S11.** Galvanostatic discharge curves at 1 A g<sup>-1</sup> current density.

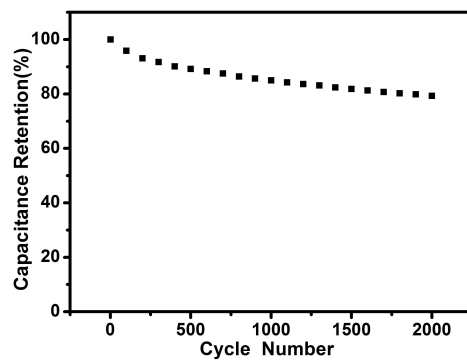

**Figure S12.** Cycling stability of the pure Ni(OH)<sub>2</sub> electrode at 40 mV s<sup>-1</sup>.

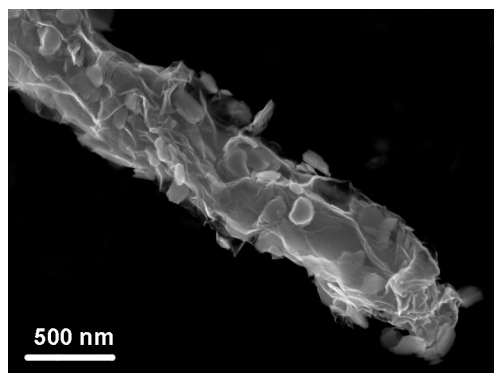

**Figure S13.** SEM image of the rGONF/Ni(OH)<sub>2</sub> after 2000 cycles.

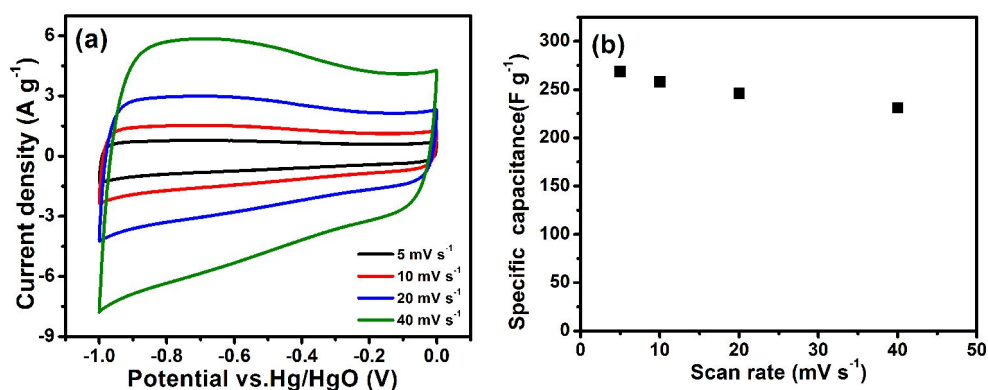

**Figure S14.** (a) CV curves of the AC at different scan rates, (b) specific capacitance at different scan rates.



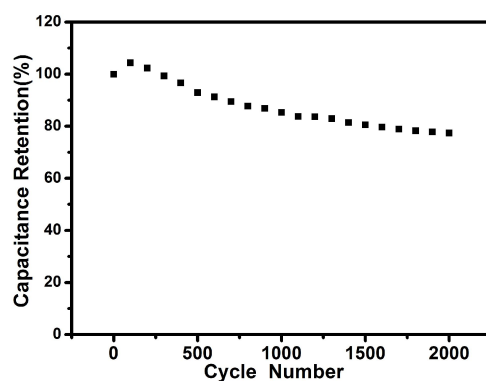

**Figure S15.** Cycling stability of the rGONF/Ni(OH)<sub>2</sub>//AC ASC at 40 mV s<sup>-1</sup> in a potential window of 0-1.7 V.

**Table S1** Summary of electrochemical data for graphene, carbon nanotube and carbon nanofiber Ni(OH)<sub>2</sub> composite supercapacitors

| Reference | Material                      | Specific capacitance (F g <sup>-1</sup> )<br>(low current density/scan rate) | Specific capacitance (F g <sup>-1</sup> )<br>(high current density/scan rate) | Rate performance | Capacitance retention(%)                  |
|-----------|-------------------------------|------------------------------------------------------------------------------|-------------------------------------------------------------------------------|------------------|-------------------------------------------|
| 1         | Ni-CNTs@β-Ni(OH) <sub>2</sub> | ~1283 (2 A g <sup>-1</sup> )                                                 | ~666 (25 A g <sup>-1</sup> )                                                  | ~51.9%           | 98%(2000 cycles, 10 A g <sup>-1</sup> )   |
| 2         | Ni(OH) <sub>2</sub> /CNF      | ~910 (2 m V <sup>-1</sup> )                                                  | ~220 (100 m V <sup>-1</sup> )                                                 | ~24.2%           | 100%(2000 cycles, 50 m V <sup>-1</sup> )  |
| 3         | N-CNF/Ni(OH) <sub>2</sub>     | ~1045 (1 m V <sup>-1</sup> )                                                 | ~380 (35 m V <sup>-1</sup> )                                                  | ~36.4%           | —                                         |
| 4         | CNT@Ni(OH) <sub>2</sub>       | ~1136 (2 A g <sup>-1</sup> )                                                 | ~384 (20 A g <sup>-1</sup> )                                                  | ~33.8%           | 92%(1000 cycles, 8 A g <sup>-1</sup> )    |
| 5         | graphene/Ni(OH) <sub>2</sub>  | ~1247 (5 m V <sup>-1</sup> )                                                 | ~785 (40 mV s <sup>-1</sup> )                                                 | ~62.9%           | 95%(2000 cycles, 16 A g <sup>-1</sup> )   |
| 5         | G-CNT/Ni(OH) <sub>2</sub>     | ~1352 (5 m V <sup>-1</sup> )                                                 | ~896 (40 mV s <sup>-1</sup> )                                                 | ~66.3%           | —                                         |
| Our work  | rGONF/Ni(OH) <sub>2</sub>     | ~1433 (5 m V <sup>-1</sup> )                                                 | ~986(40 mV s <sup>-1</sup> )                                                  | ~68.8%           | 90.5%(2000 cycles, 40 m V <sup>-1</sup> ) |

## References

- (1) Ma, X.; Li, Y.; Wen, Z.; Gao, F.; Liang, C.; Che, R. Ultrathin  $\beta$ -Ni(OH)<sub>2</sub> Nanoplates Vertically Grown on Nickel-coated Carbon Nanotubes as High-Performance Pseudocapacitor Electrode Materials. *ACS Appl. Mater. Interfaces* **2015**, 7, 974-979.
- (2) Lai, C. C.; Lo, C. T. Effect of Temperature on Morphology and Electrochemical Capacitive Properties of Electrospun Carbon Nanofibers and Nickel Hydroxide Composites. *Electrochim. Acta* **2015**, 174, 806-814.
- (3) Cai, J.; Niu, H.; Li, Z.; Du, Y.; Cizek, P.; Xie, Z.; Xiong, H.; Lin, T. High-Performance Supercapacitor Electrode Materials from Cellulose-Derived Carbon Nanofibers. *ACS Appl. Mater. Interfaces* **2015**, 7, 14946-14953.
- (4) Yi, H.; Wang, H.; Jing, Y.; Peng, T.; Wang, Y.; Guo, J.; He, Q.; Guo, Z.; Wang, X. Advanced asymmetric supercapacitors based on CNT@Ni(OH)<sub>2</sub> core-shell composites and 3D graphene networks. *J. Mater. Chem. A* **2015**, 3, 19545-19555.
- (5) Xu, Y.; Huang, X.; Lin, Z.; Zhong, X.; Huang, Y.; Duan, X. One-step strategy to graphene/Ni(OH)<sub>2</sub> composite hydrogels as advanced three-dimensional supercapacitor electrode materials. *Nano Res.* **2012**, 6, 65-76.
- (6) Li, L.; Xu, J.; Lei, J.; Zhang, J.; McLarnon, F.; Wei, Z.; Li, N.; Pan, F. A One-Step, Cost-Effective Green Method to in Situ Fabricate Ni(OH)<sub>2</sub> Hexagonal Platelets On Ni Foam as Binder-Free Supercapacitor Electrode Materials. *J. Mater. Chem. A* **2015**, 3, 1953-1960.
